# Supplementary material
Source: PubMed Central journal article supplement (PMC7424277)
Supplement: gbz011_suppl_supplementary_figure_1.pdf [file gbz011_suppl_supplementary_figure_1.pdf]

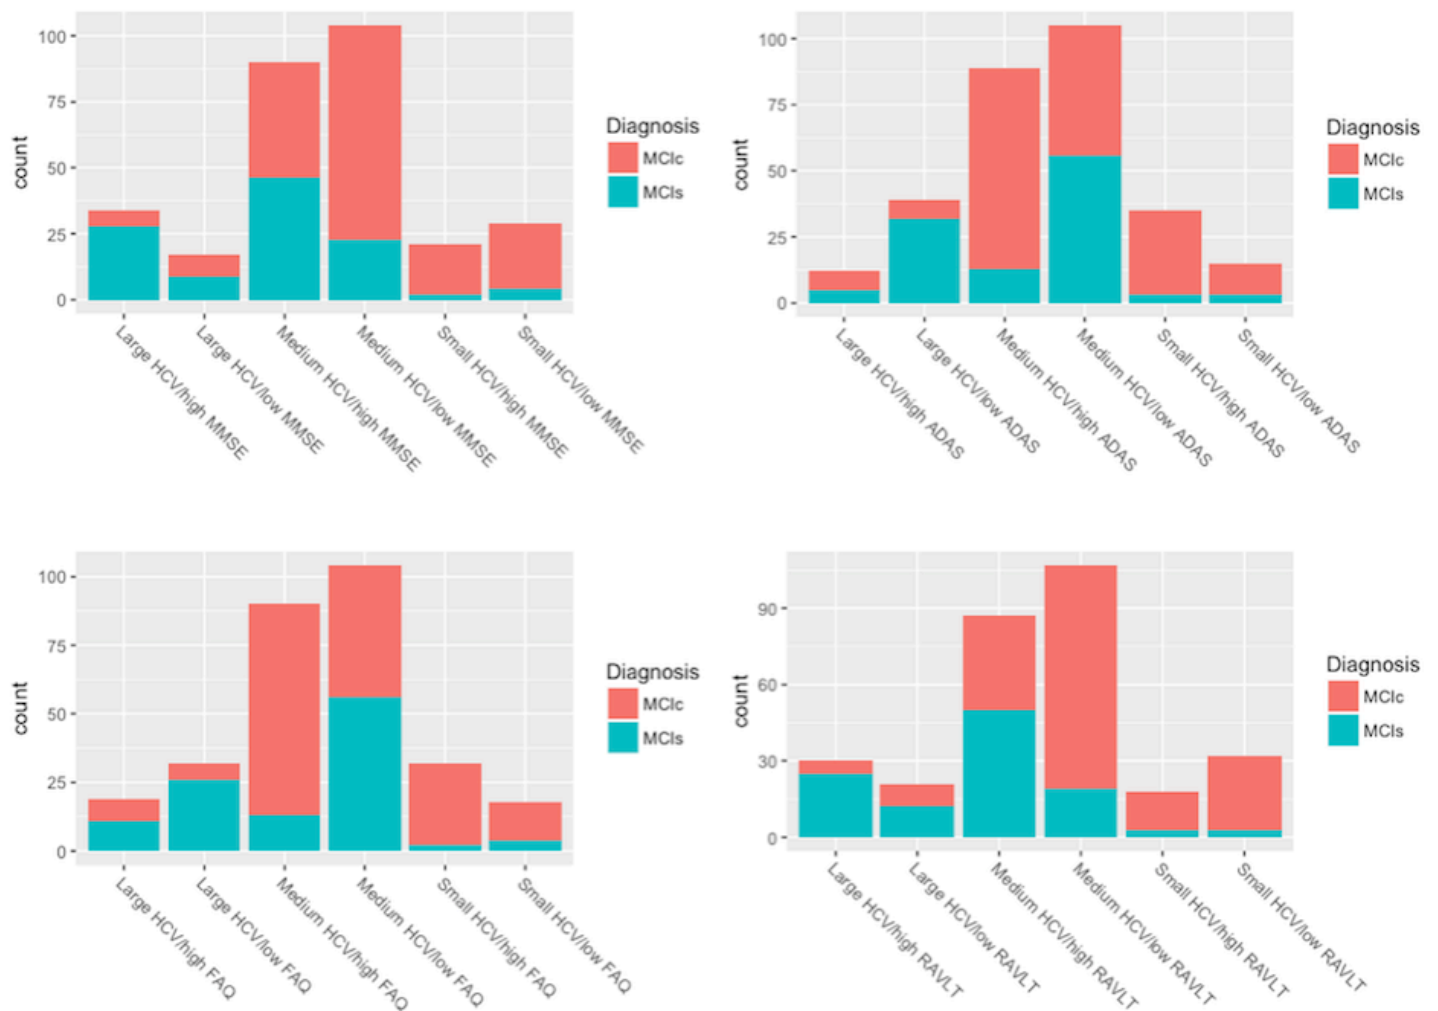

**Supplementary Figure 1: Number of participants at different hippocampal and**

**cognitive/functional categories:** In general the proportion of those who converted to AD are higher at small hippocampal volume regardless of the value of cognitive/functional measure.

MCIc; mild cognitive impairment converted to Alzheimer’s disease within five years, MCIs; mild cognitive impairment stable for five or more years, HCV; hippocampal volume adjusted by age, field strength and intracranial volume, MMSE; mini mental state examination, ADAS; Alzheimer disease assessment scale (cognitive subscale), RAVLT; Rey auditory verbal learning test (immediate memory subscale), FAQ; functional assessment questionnaire.
